# Supplementary material
Source: PubMed Central journal article supplement (PMC3725598)
Supplement: NIHMS480642-supplement-1_si_001.pdf [file NIHMS480642-supplement-1_si_001.pdf]

## Supporting Information

### List of Figures

|                                                                                    |   |
|------------------------------------------------------------------------------------|---|
| Figure S-1: [MS and MS/MS spectra for derivatized HS disaccharide standards] ..... | 2 |
| Figure S-2: [MS spectra for derivatized NS-decamer].....                           | 3 |
| Figure S-3: [MS/MS spectra for derivatized NS-undecamer].....                      | 4 |
| Figure S-4: [MS/MS zoom-in spectra for derivatized NS-decamer] .....               | 5 |
| Figure S-5: [MS spectra for derivatized Arixtra-like heptamer] .....               | 6 |

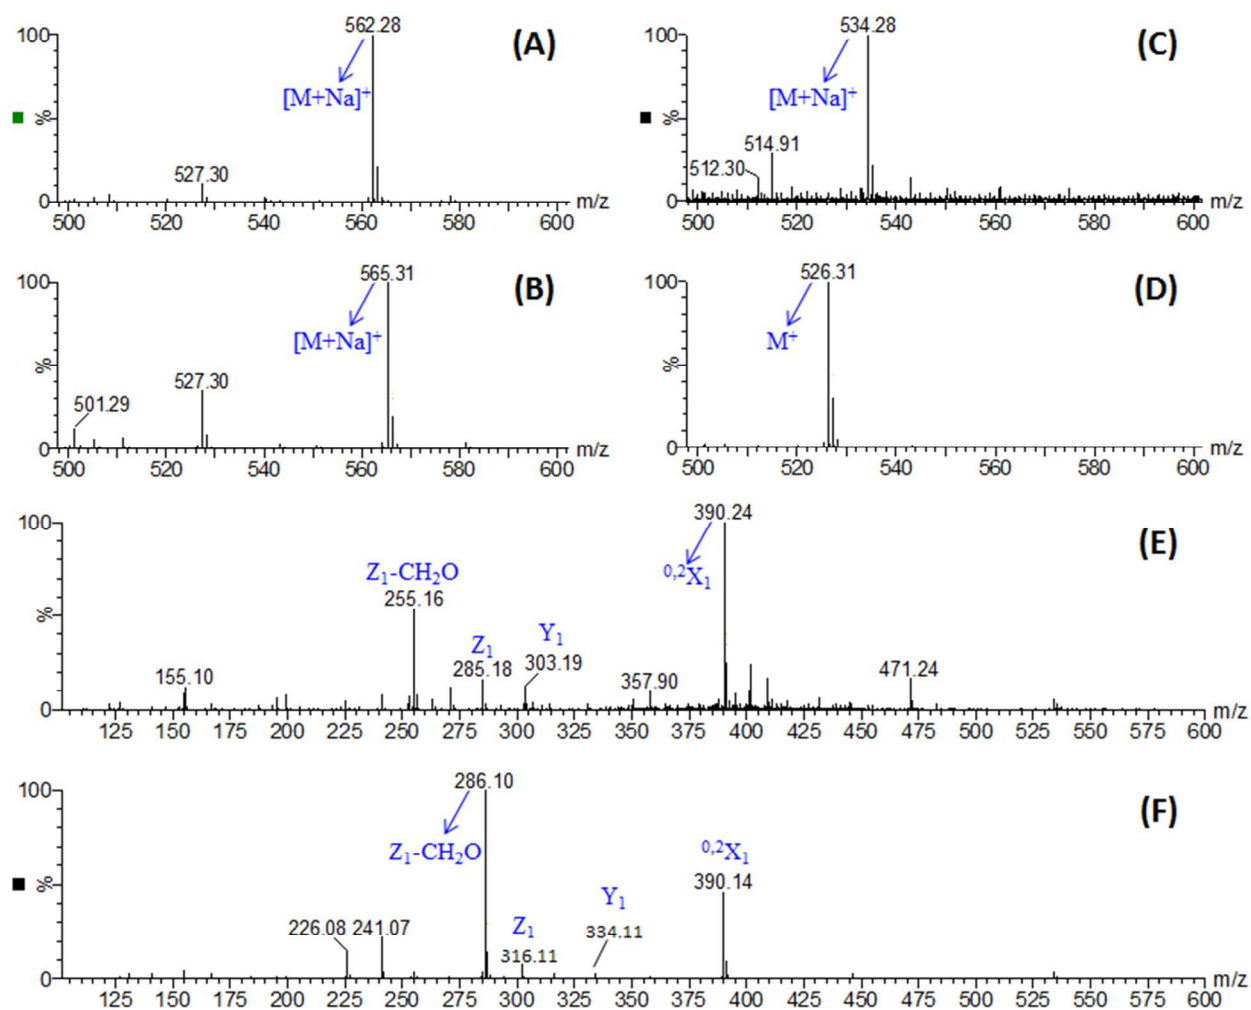

**Figure S-1.** MS spectra for derivatized  $\Delta$ UA2S-GlcNAc6S (A),  $\Delta$ UA2S-GlcNS6S (B),  $\Delta$ UA2S-GlcNS (C),  $\Delta$ UA2S-GlcN6S (D) and MS/MS spectra for  $\Delta$ UA2S-GlcNS (E),  $\Delta$ UA-GlcNS6S (F). A mass difference of 3Da were observed for derivatized  $\Delta$ UA2S-GlcNAc6S and  $\Delta$ UA2S-GlcNS6S, indicating the use trideuteroacetylation enable the differentiation between native N-acetyl group and trideuteroacetyl group from peracetylation step (spectra A and B). For derivatized  $\Delta$ UA2S-GlcNS and  $\Delta$ UA2S-GlcN6S, a mass difference of 14Da was observed between derivatized  $\Delta$ UA2S-GlcN6S (detected as  $M^+$ ) and  $\Delta$ UA2S-GlcNS (detected as  $[M+H]^+$ ), or a mass difference of 8Da between derivatized  $\Delta$ UA2S-GlcN6S (detected as  $M^+$ ) and  $\Delta$ UA2S-GlcNS (detected as  $[M+Na]^+$ ) (spectra C and D). For another pair of sulfation positional isomers, the  $Y_1$  and  $Z_1$  ions containing the GlcN residue were 31Da larger for  $\Delta$ UA-GlcNS6S than  $\Delta$ UA2S-GlcNS, indicating an original sulfation modification was on GlcN for  $\Delta$ UA-GlcNS6S and one on  $\Delta$ UA for  $\Delta$ UA2S-GlcNS (spectra E and F).

## MS spectra of derivatized NS-decamer

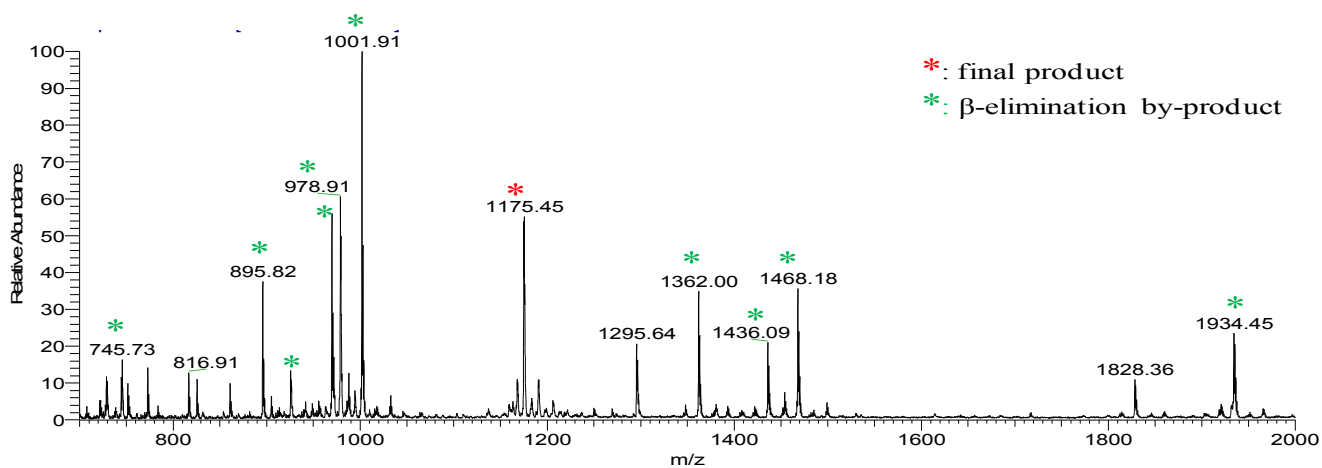

**Figure S-2.** Direct infusion MS spectrum of the desalted derivatization products of the NS-decamer sequenced in **Figure 2A**. The byproducts are all beta-elimination products that are separated in the reverse phase LC run, and do not result in erroneous sequencing of the product, just in lower sensitivity.

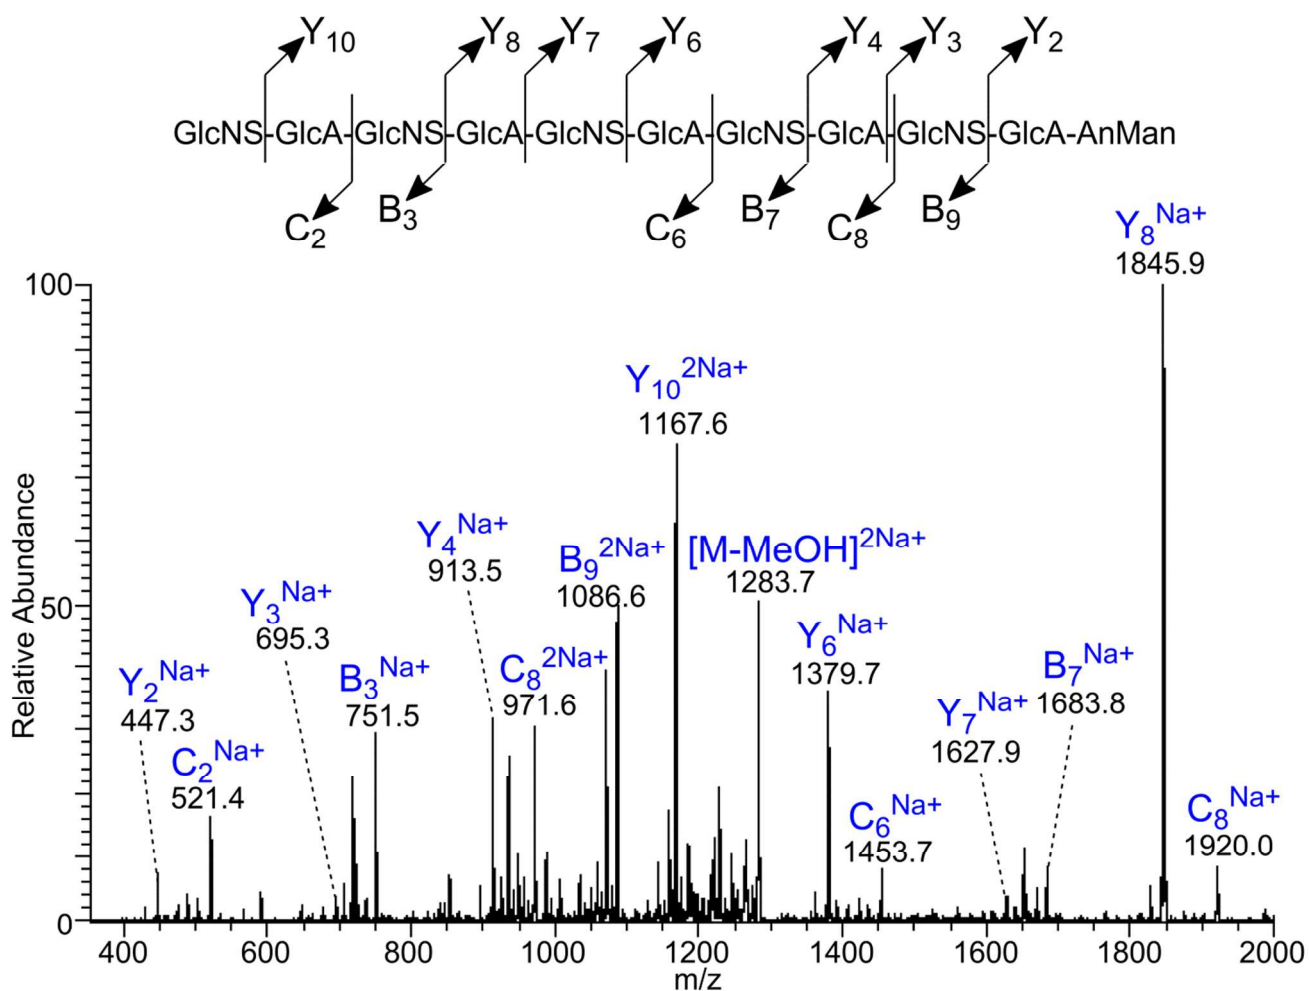

**Figure S-3.** MS/MS spectra for fully derivatized synthesized NS-undecamer. Sufficient sequential glycosidic bond cleavage fragments were observed, which enable the accurate and complete structural sequencing.

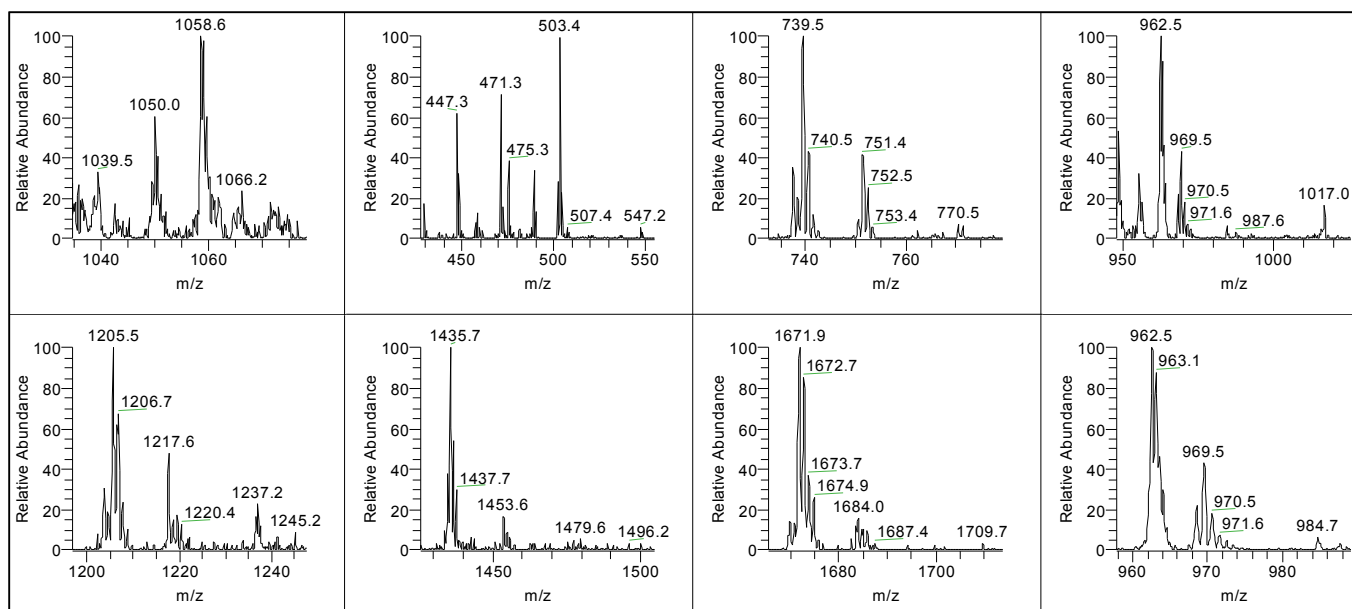

**Figure S-4.** Zoomed view of MS/MS spectra for the fully derivatized synthesized NS-decamer, shown in **Figure 2A**. These zoomed-in views of the MS/MS spectra clearly show, as described in the manuscript, how an unambiguous interpretation of the MS/MS spectra of fully derivatized HS oligomers can be achieved.

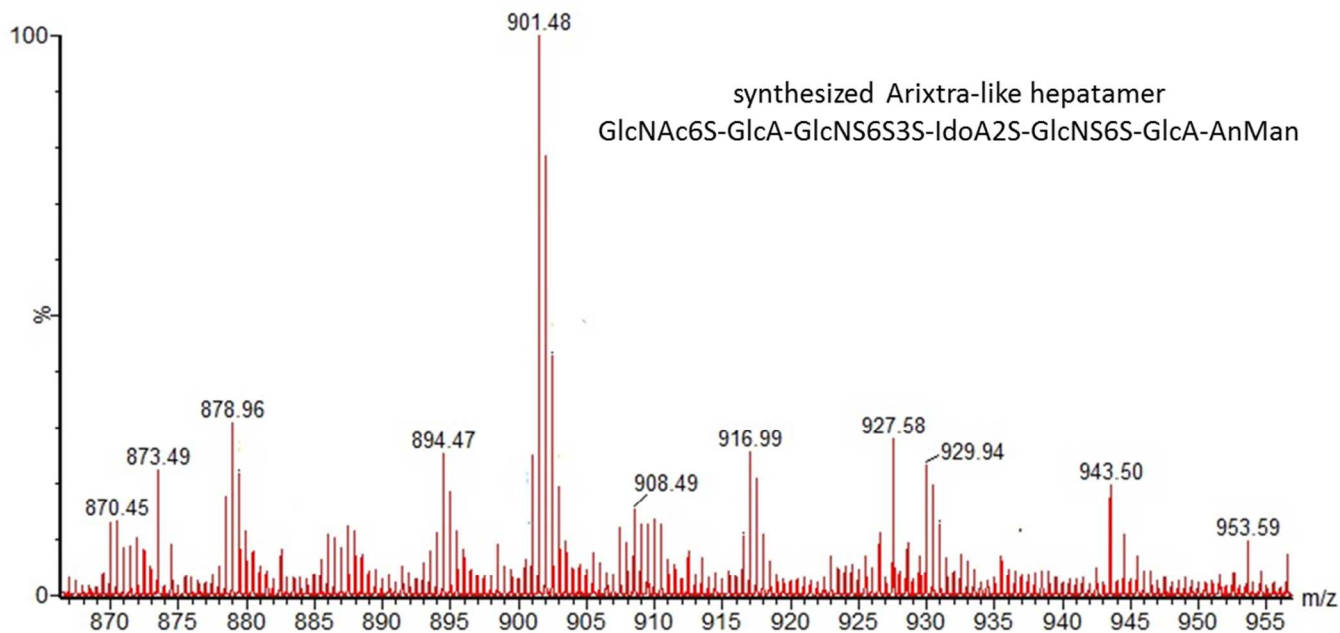

**Figure S-5.** MS spectra for the fully derivatized synthesized Arixtra-like hepatamer. As we can see from the spectra, after derivatization the most abundant ion we observed is 901.48, while the theoretical value for a fully permethylated, desulfated and acetylated product should give a m/z of 908.49 for  $[M+2Na]^{2+}$  ion. The mass difference between hydrogen and methyl group is also 14Da, indicating that there is one under-permethylation site which could not be further acetylated.
